# Supplementary material for: Fast computation of spatially adaptive kernel estimates
Source: Springer Nature journal article supplement (doi:10.1007/s11222-017-9772-4), 2017-08-05
Supplement: 11222_2017_9772_MOESM1_ESM.pdf [file 11222_2017_9772_MOESM1_ESM.pdf]

# Supplementary Material for “Fast computation of spatially adaptive kernel estimates” – Partition Accuracy Simulation Results

Tilman M. Davies and Adrian Baddeley

May 15, 2017

Supplementary figures (**Supp. Fig.**) 1-6 are Case 1; 7-12 are Case 2; 13-18 are Case 3; 19-24 are Case 4.

## CASE 1

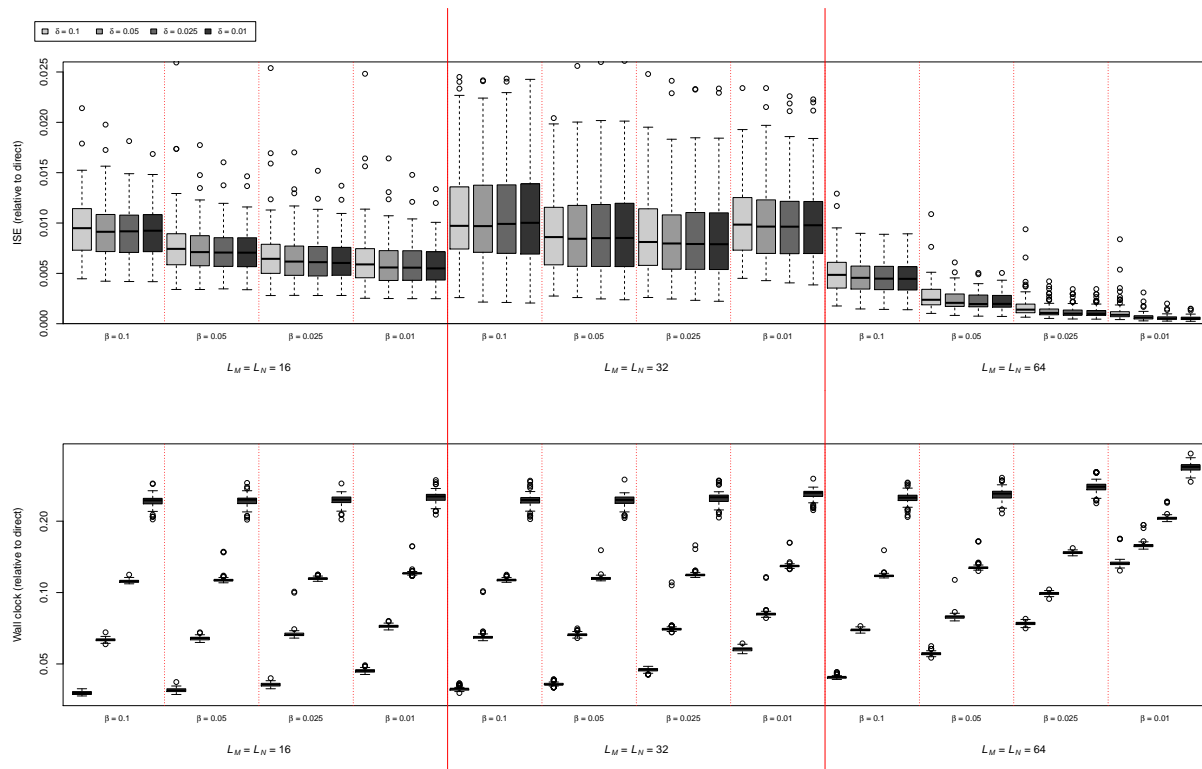

Supp. Fig. 1:  $\mu = 100, MN = 64^2$

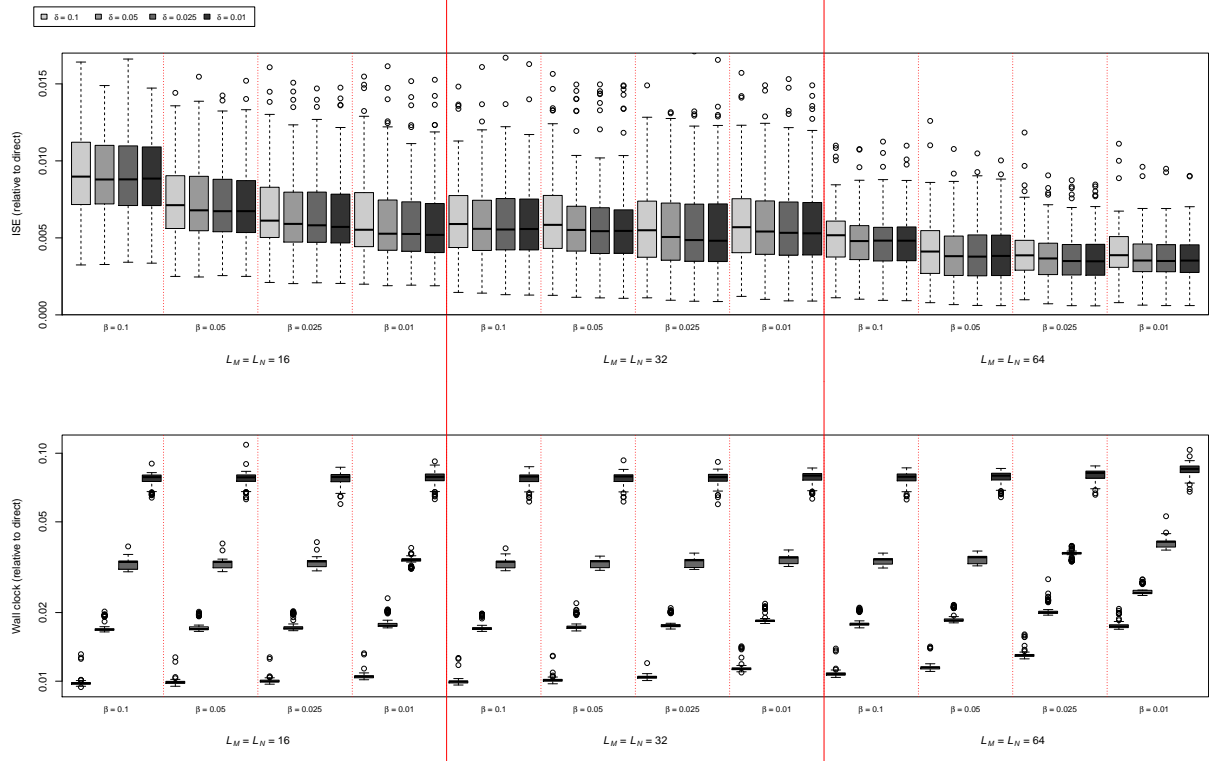

Supp. Fig. 2:  $\mu = 100, MN = 128^2$

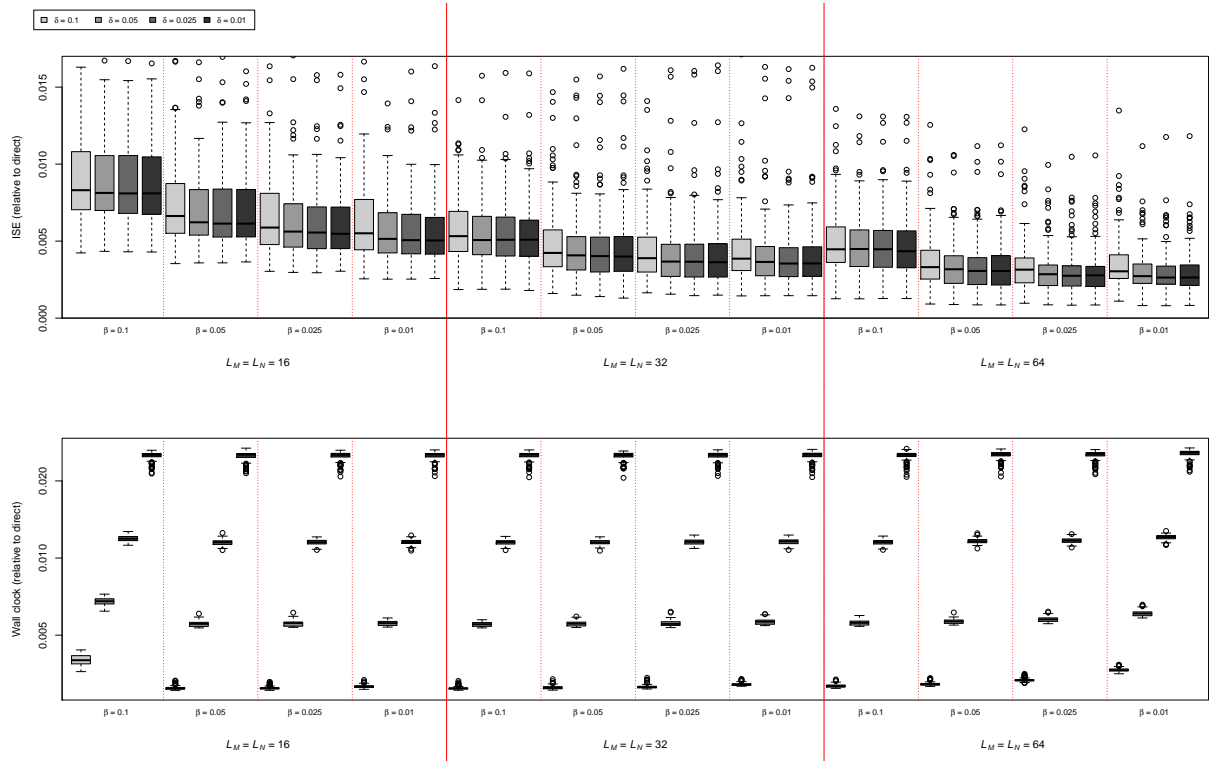

Supp. Fig. 3:  $\mu = 100, MN = 256^2$

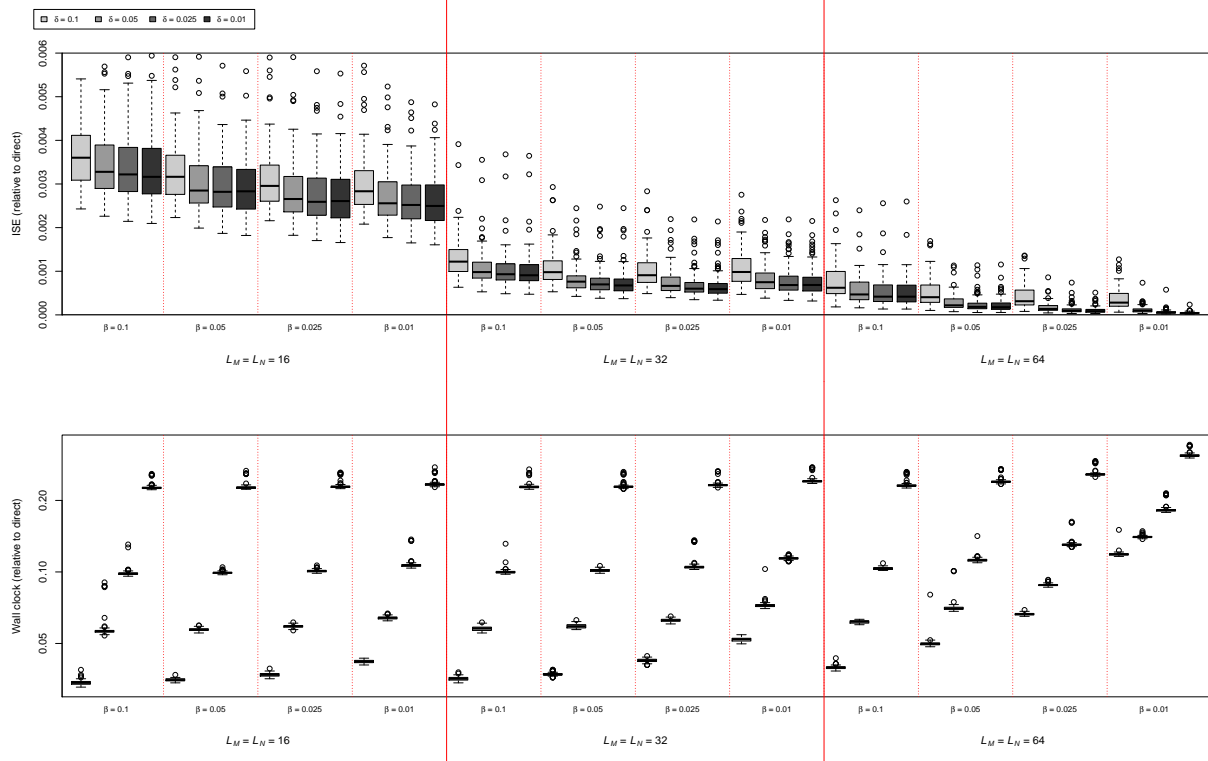

Supp. Fig. 4:  $\mu = 1000, MN = 64^2$

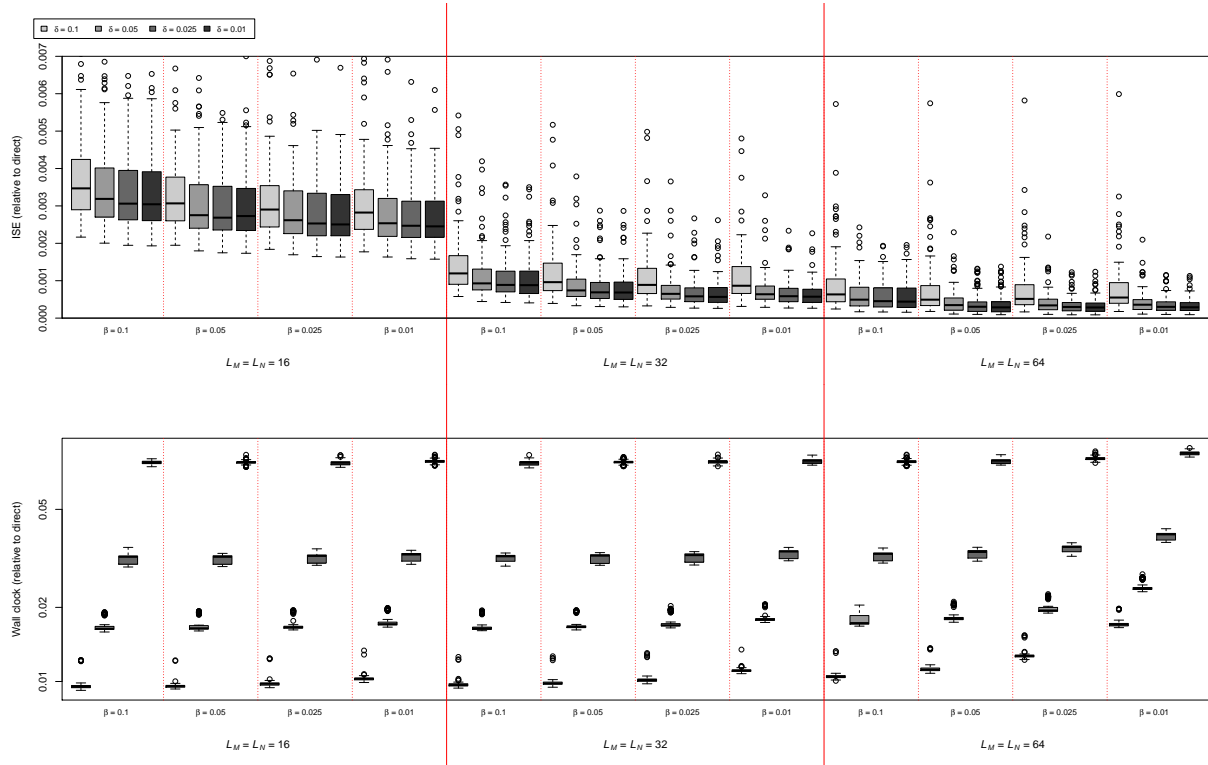

Supp. Fig. 5:  $\mu = 1000, MN = 128^2$

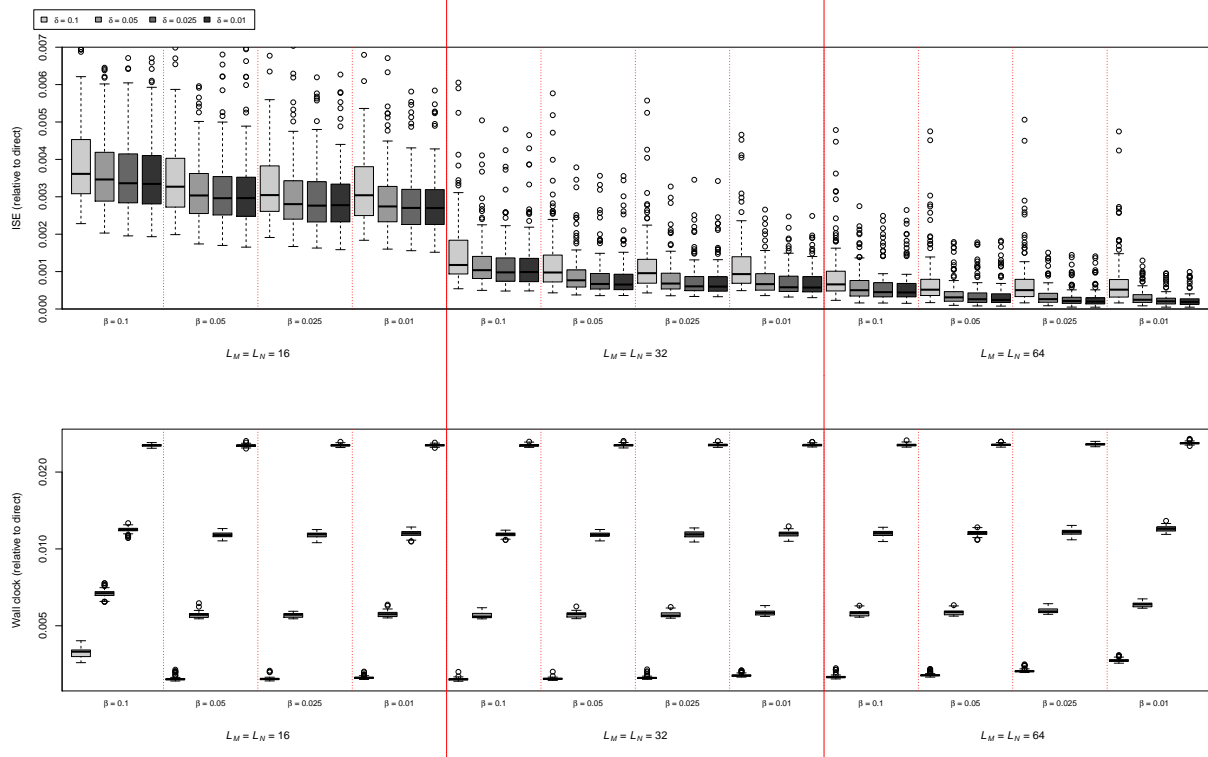

Supp. Fig. 6:  $\mu = 1000, MN = 256^2$

# CASE 2

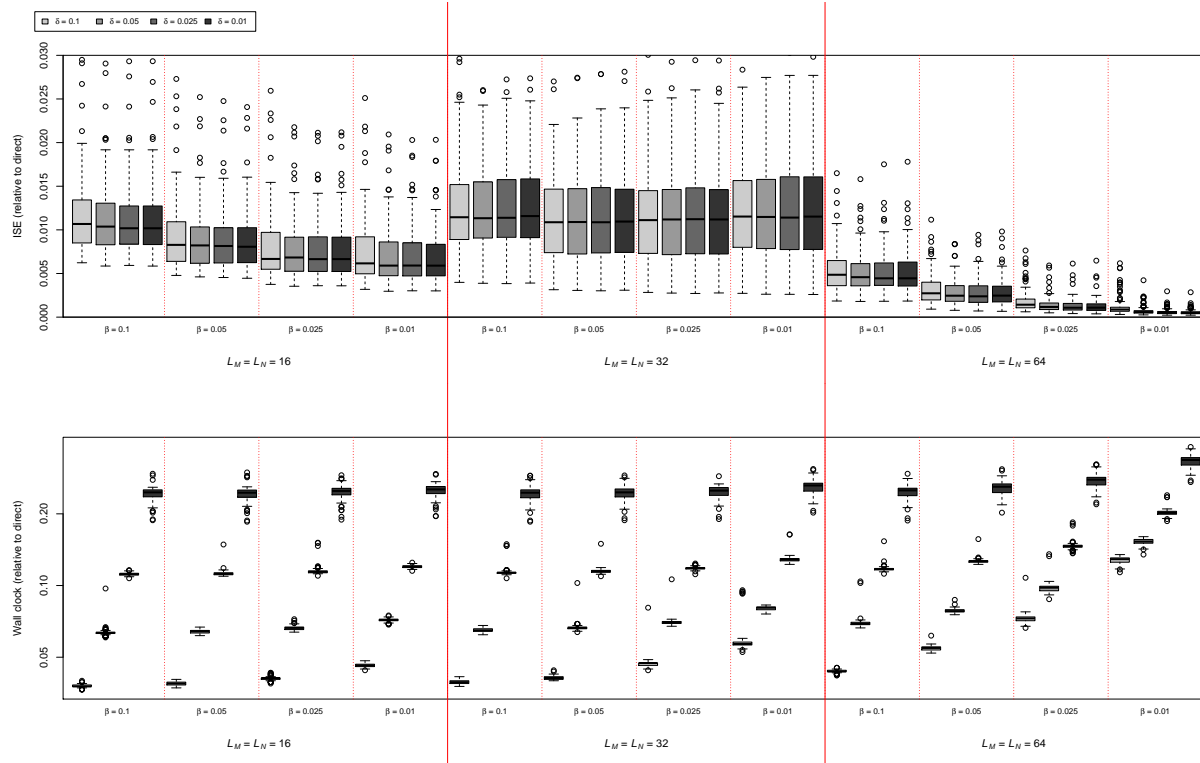

Supp. Fig. 7:  $\mu = 100, MN = 64^2$

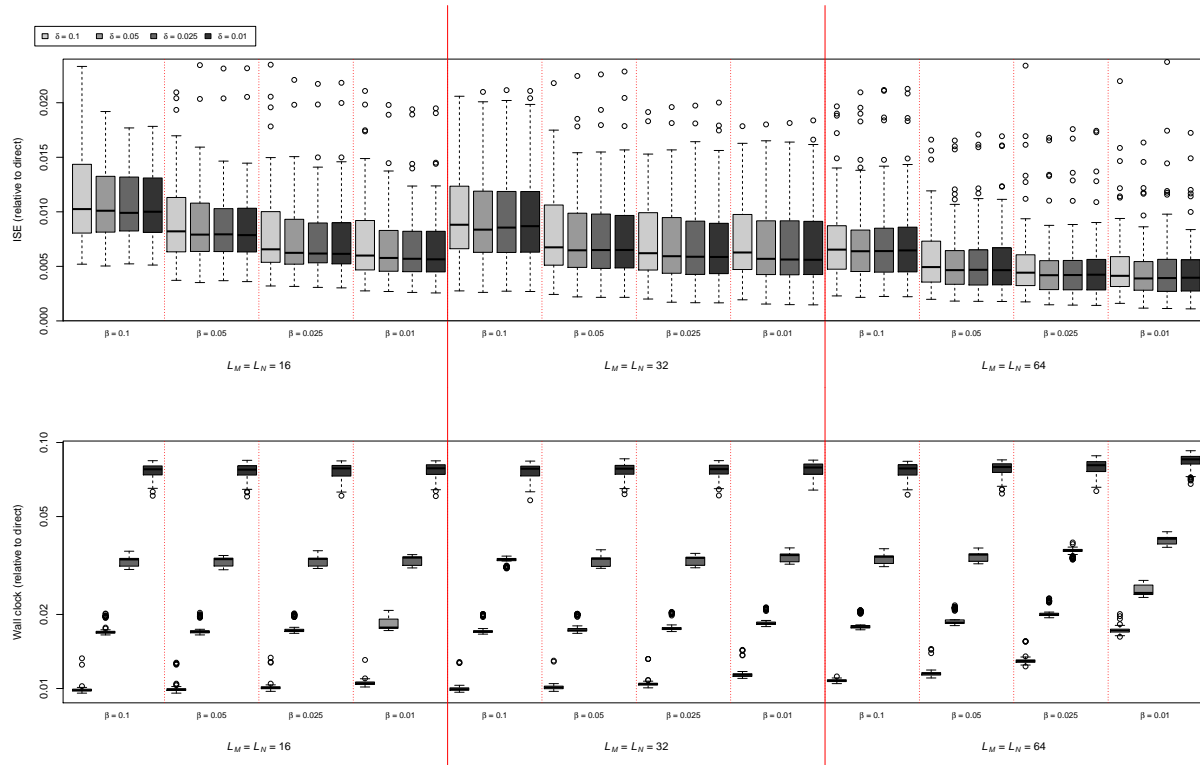

Supp. Fig. 8:  $\mu = 100, MN = 128^2$

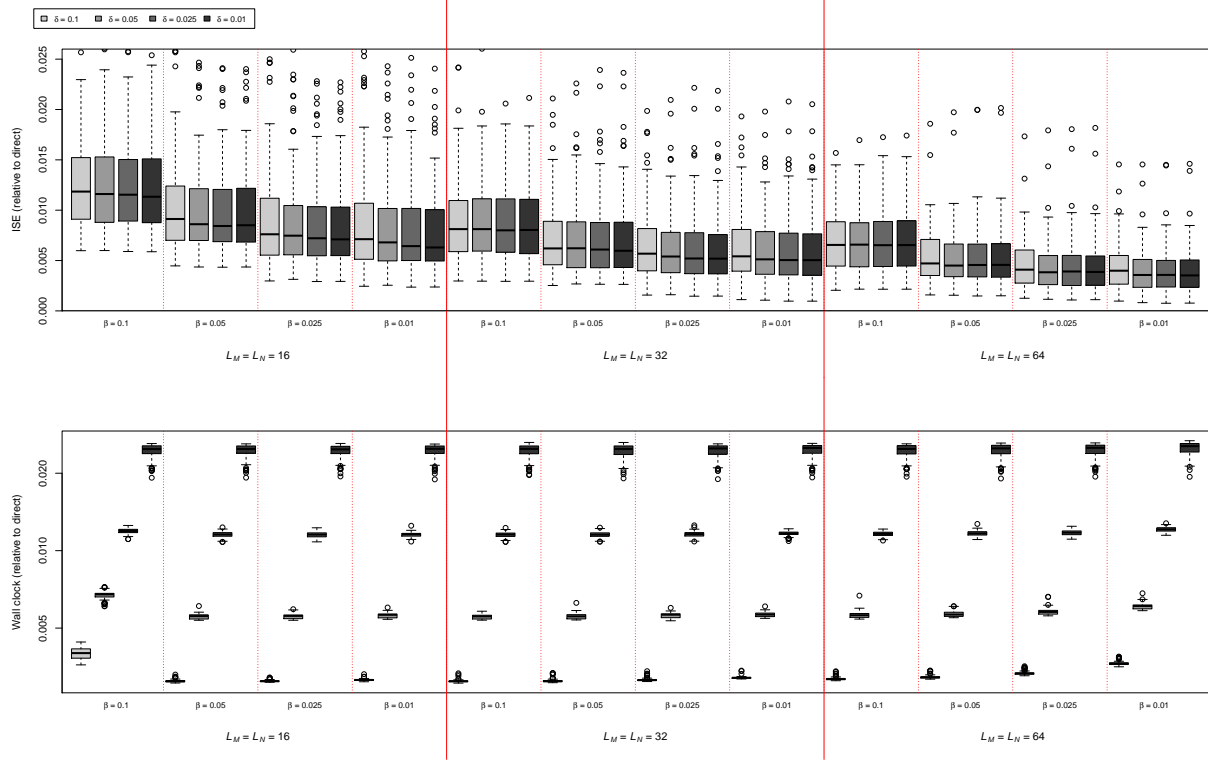

Supp. Fig. 9:  $\mu = 100, MN = 256^2$

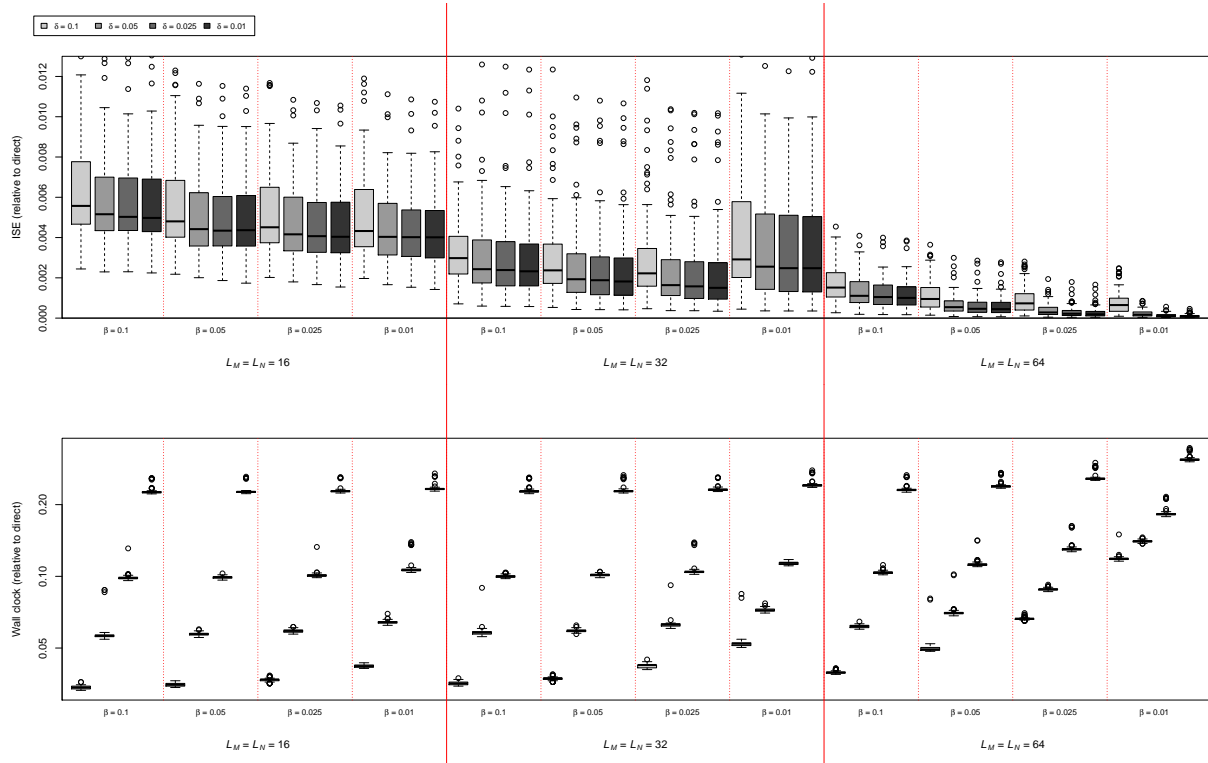

Supp. Fig. 10:  $\mu = 1000, MN = 64^2$

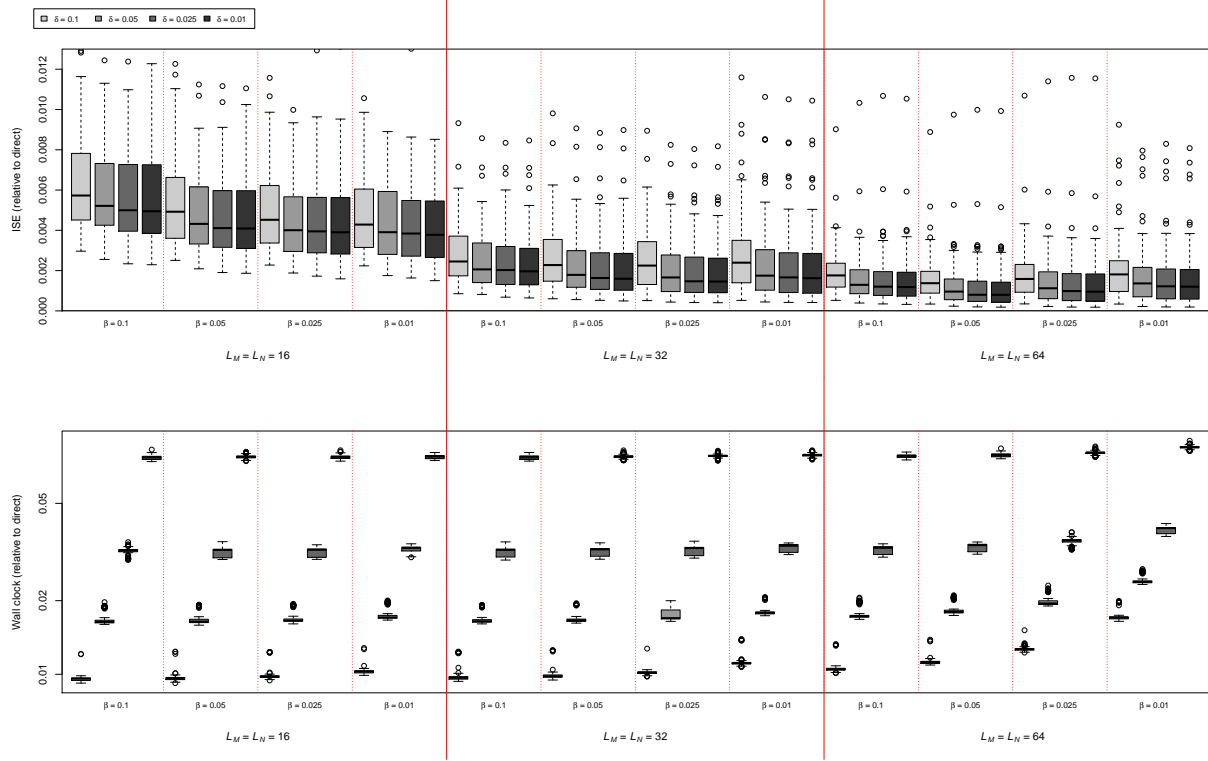

Supp. Fig. 11:  $\mu = 1000, MN = 128^2$

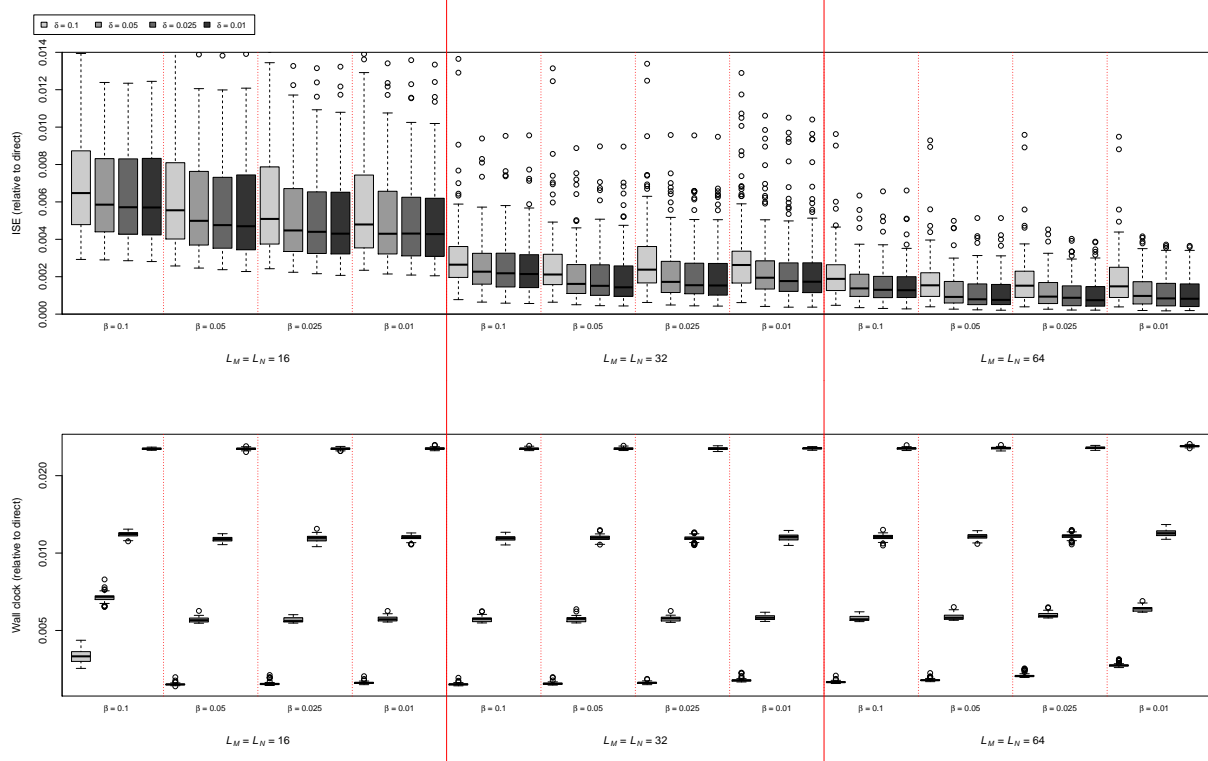

Supp. Fig. 12:  $\mu = 1000, MN = 256^2$

# CASE 3

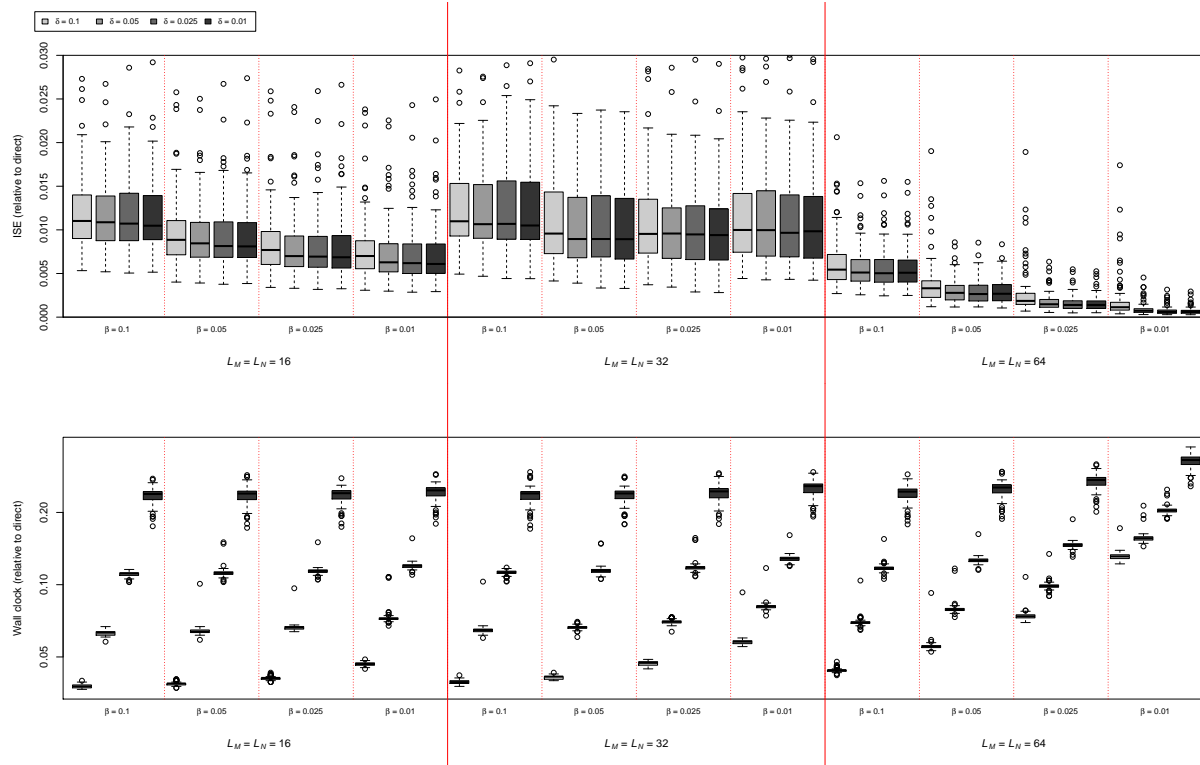

Supp. Fig. 13:  $\mu = 100, MN = 64^2$

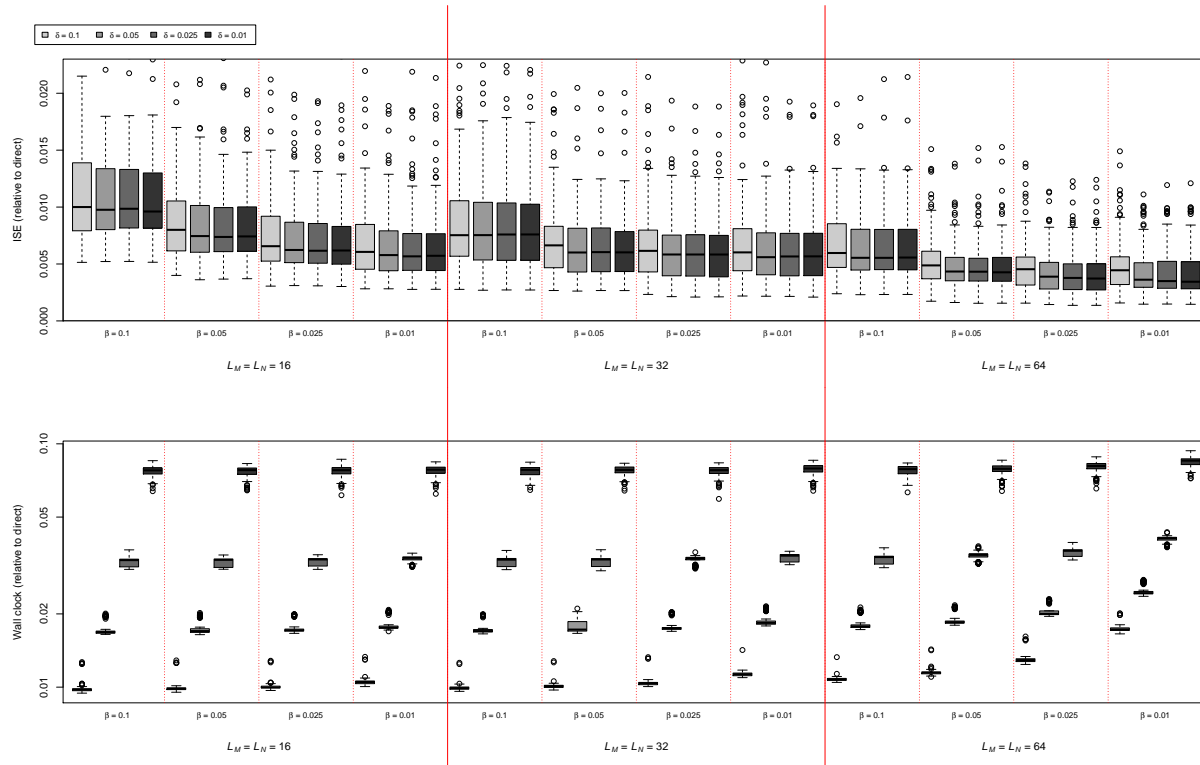

Supp. Fig. 14:  $\mu = 100, MN = 128^2$



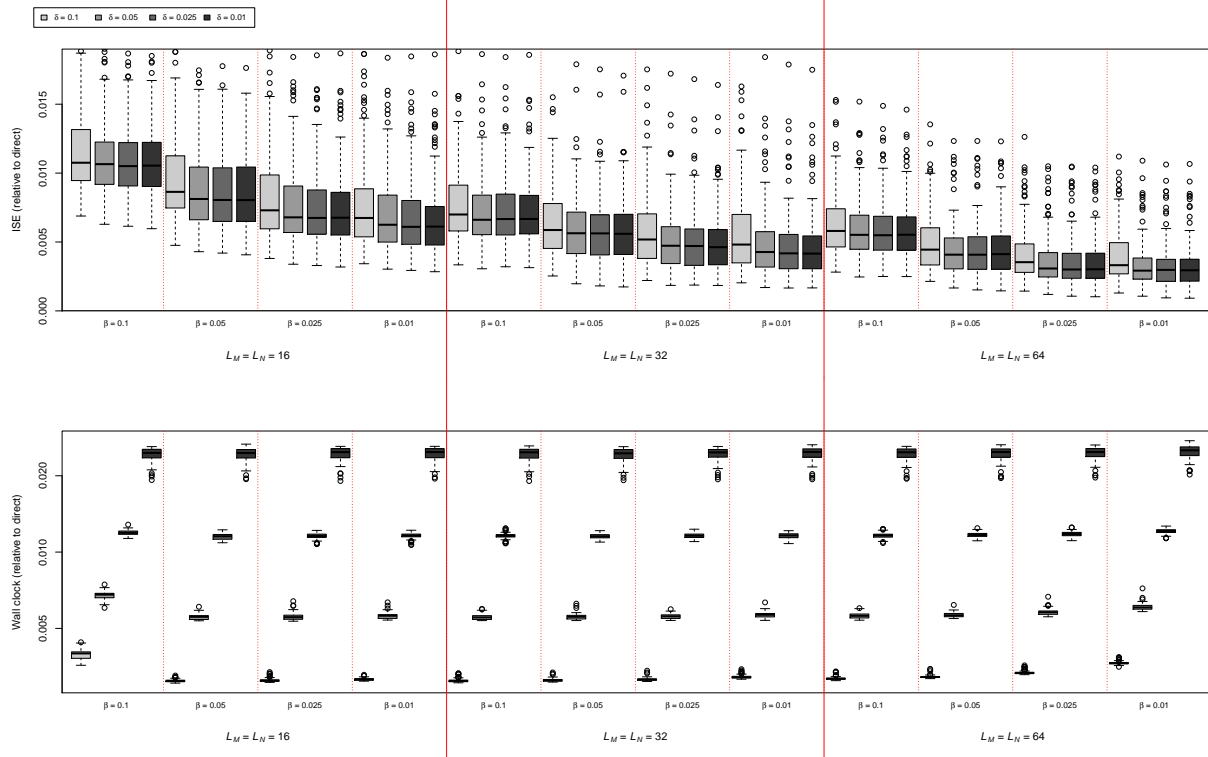

Supp. Fig. 15:  $\mu = 100, MN = 256^2$

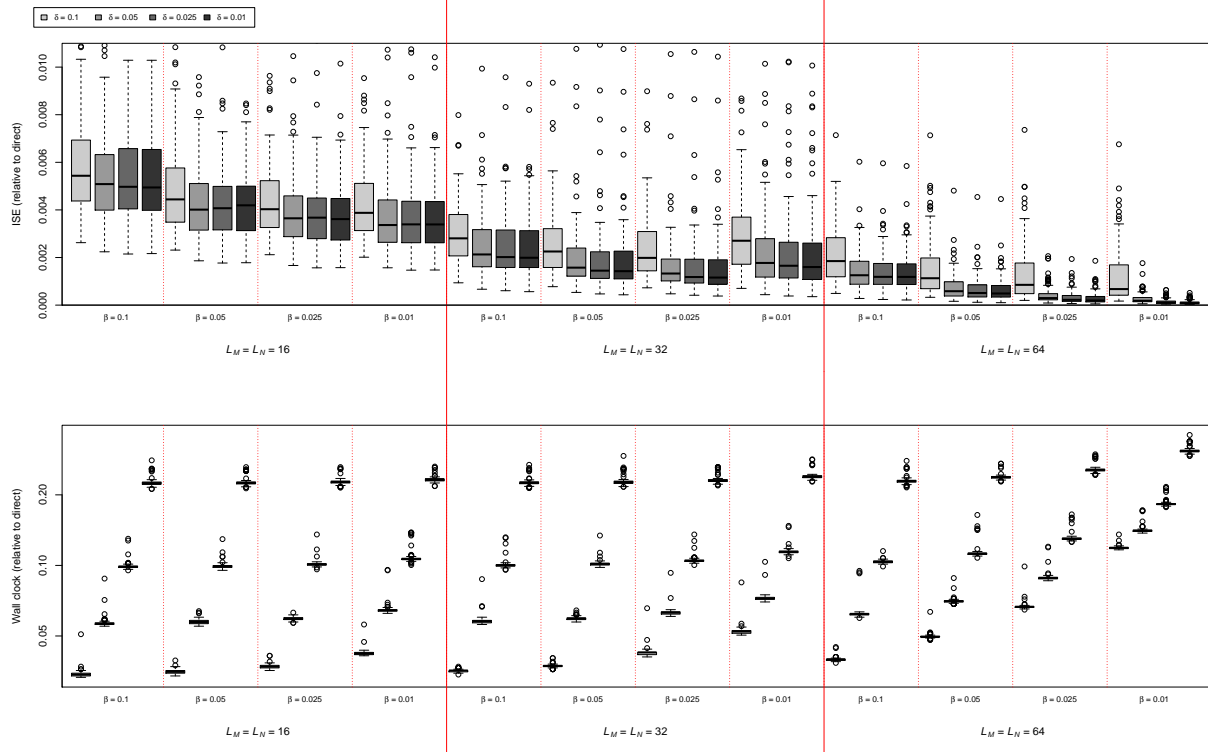

Supp. Fig. 16:  $\mu = 1000, MN = 64^2$

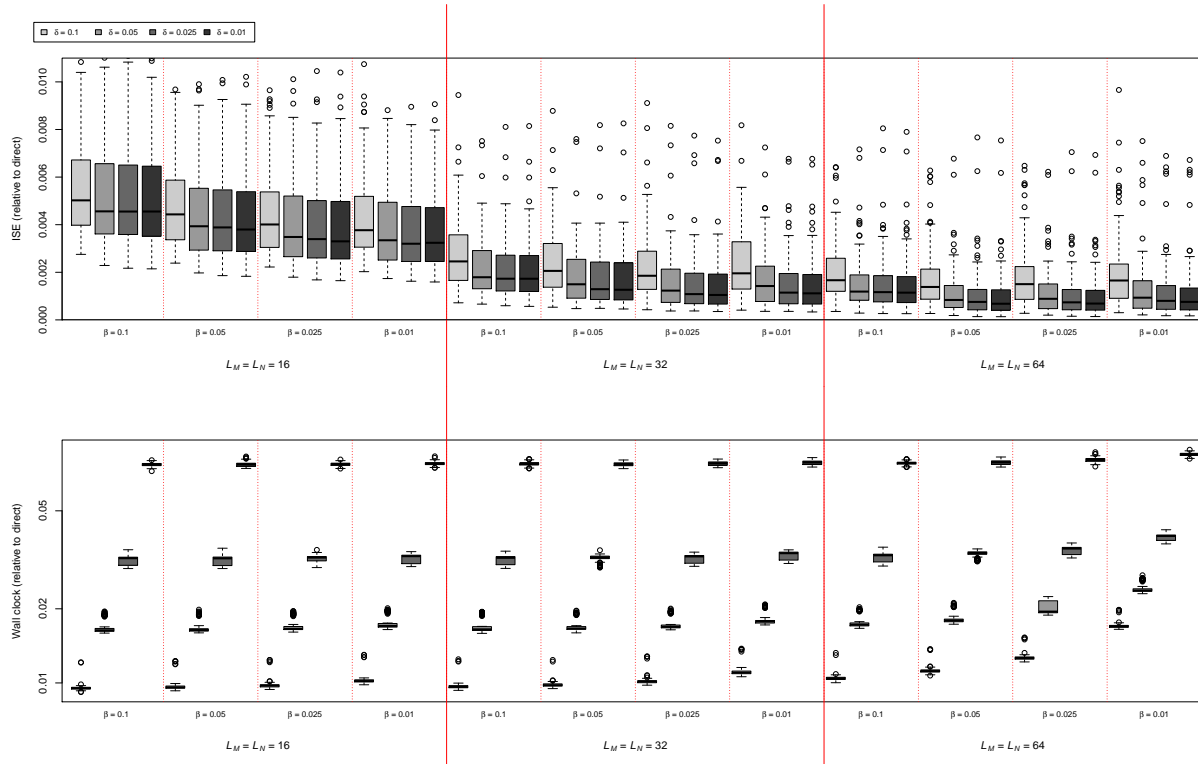

Supp. Fig. 17:  $\mu = 1000, MN = 128^2$

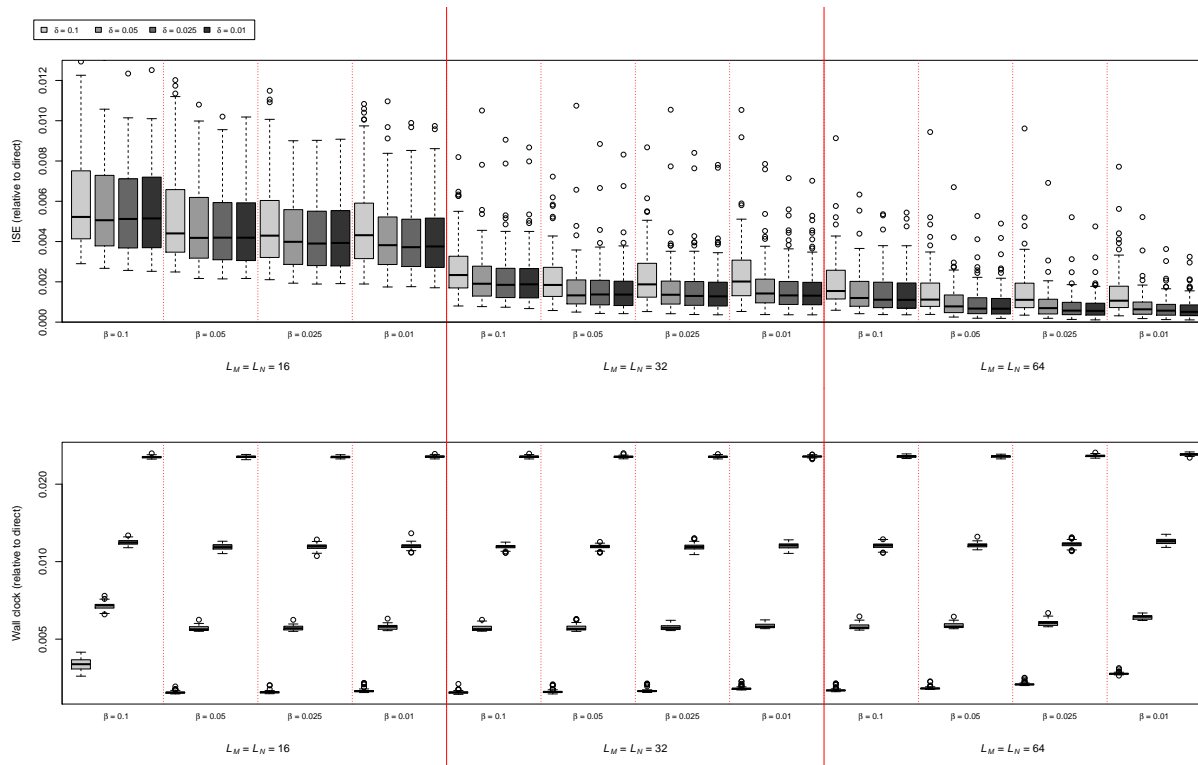

Supp. Fig. 18:  $\mu = 1000, MN = 256^2$

# CASE 4

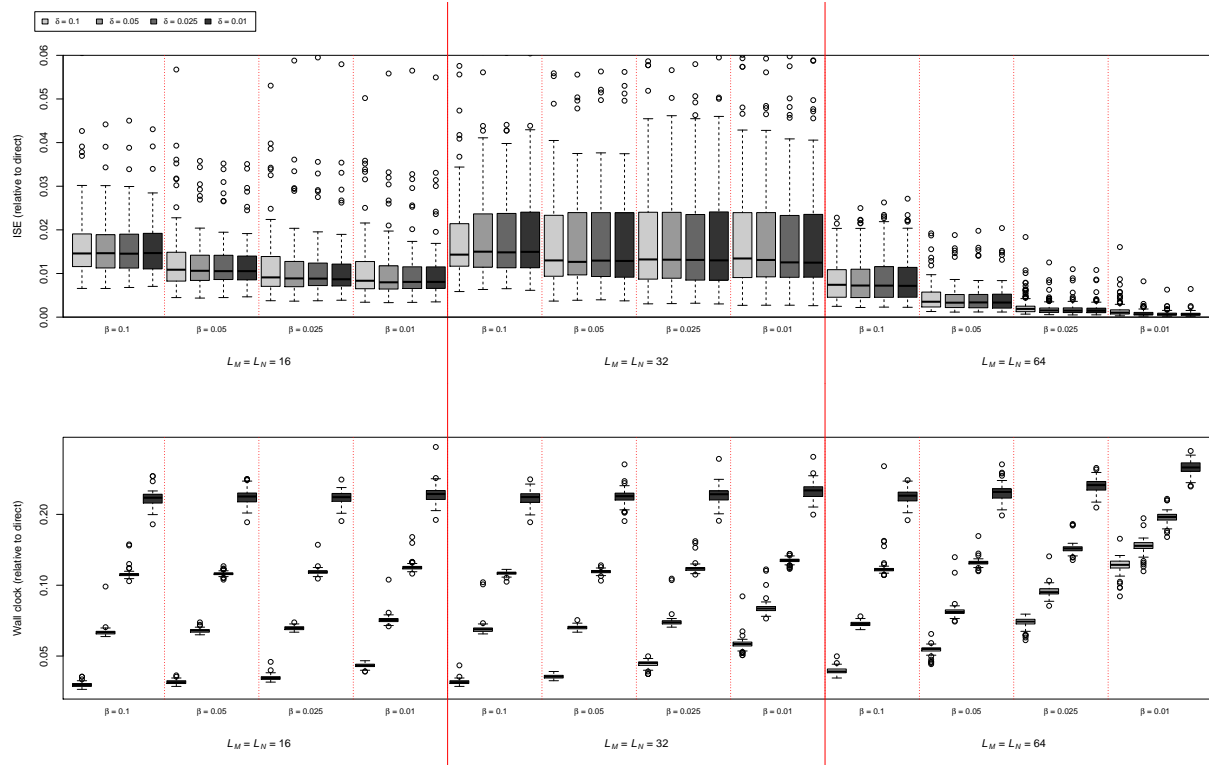

Supp. Fig. 19:  $\mu = 100, MN = 64^2$

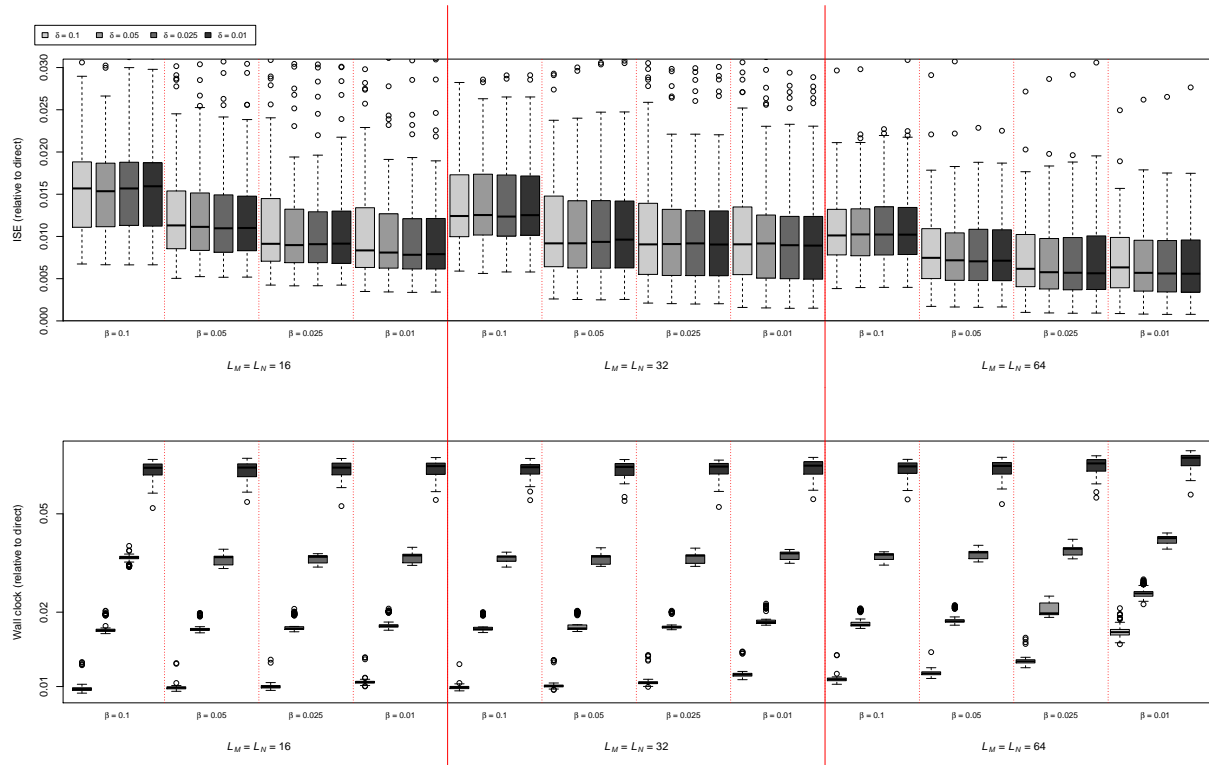

Supp. Fig. 20:  $\mu = 100, MN = 128^2$

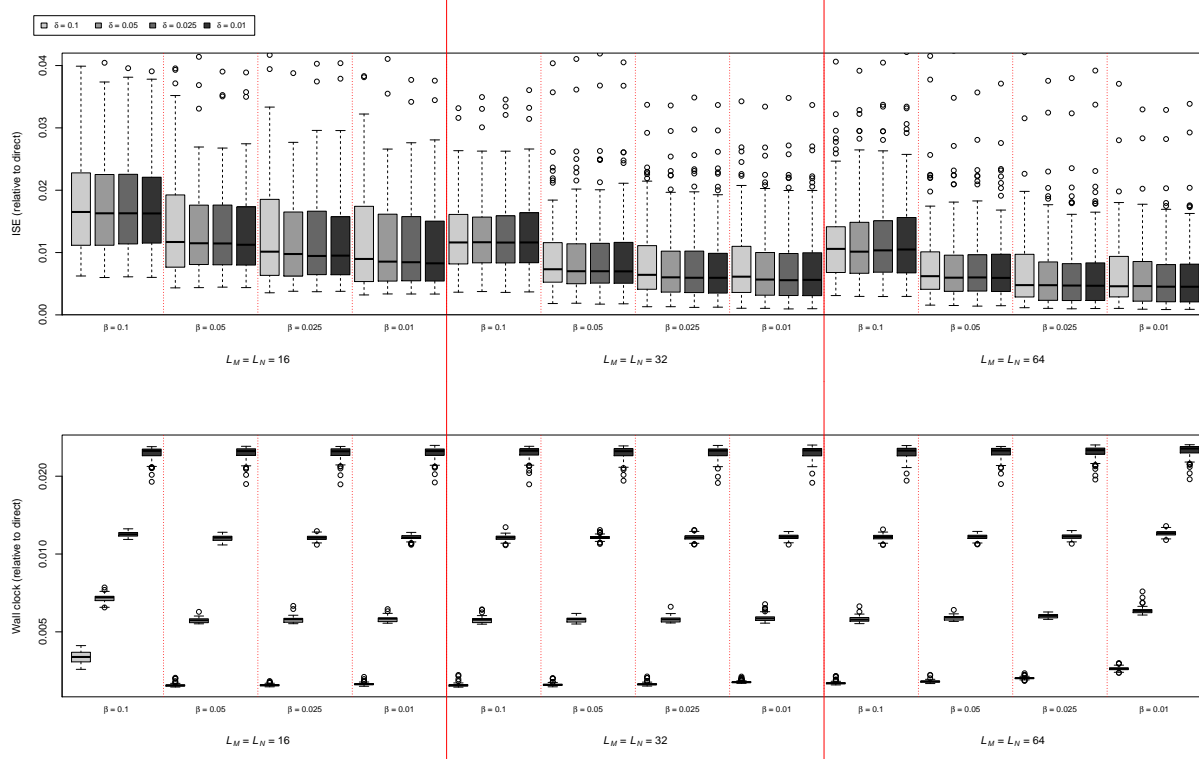

Supp. Fig. 21:  $\mu = 100, MN = 256^2$

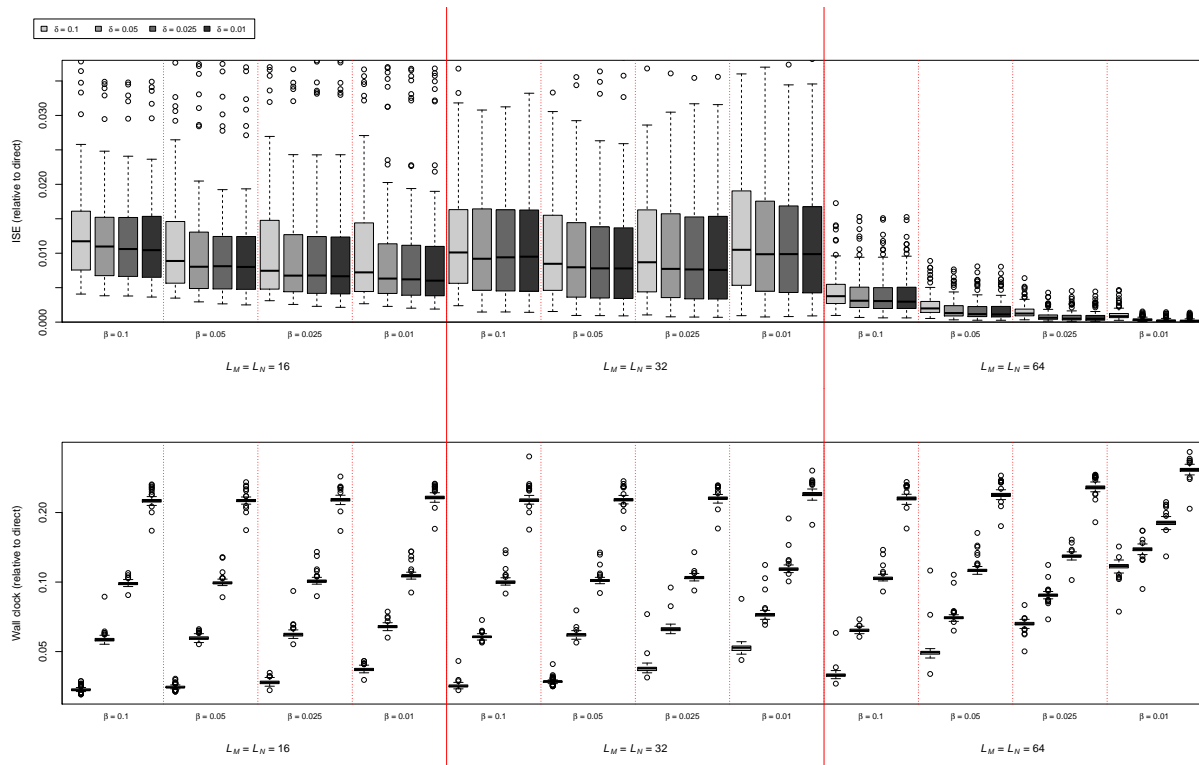

Supp. Fig. 22:  $\mu = 1000, MN = 64^2$

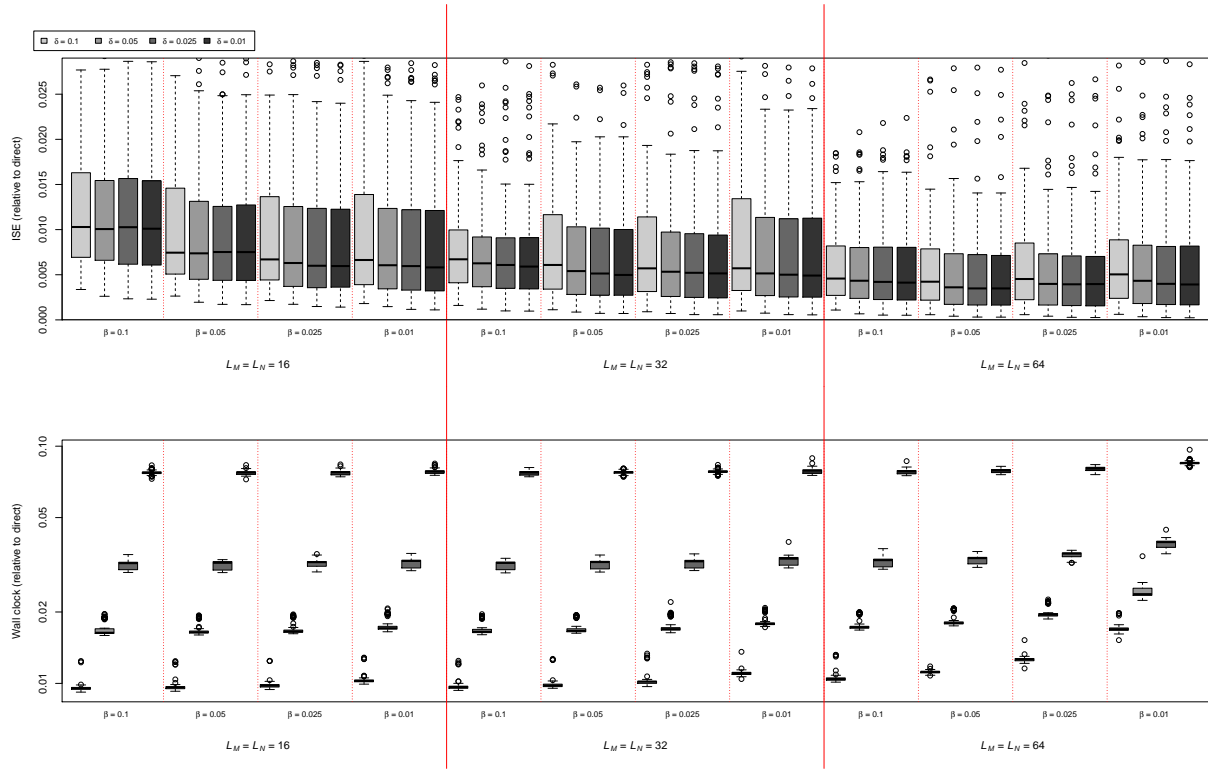

Supp. Fig. 23:  $\mu = 1000, MN = 128^2$

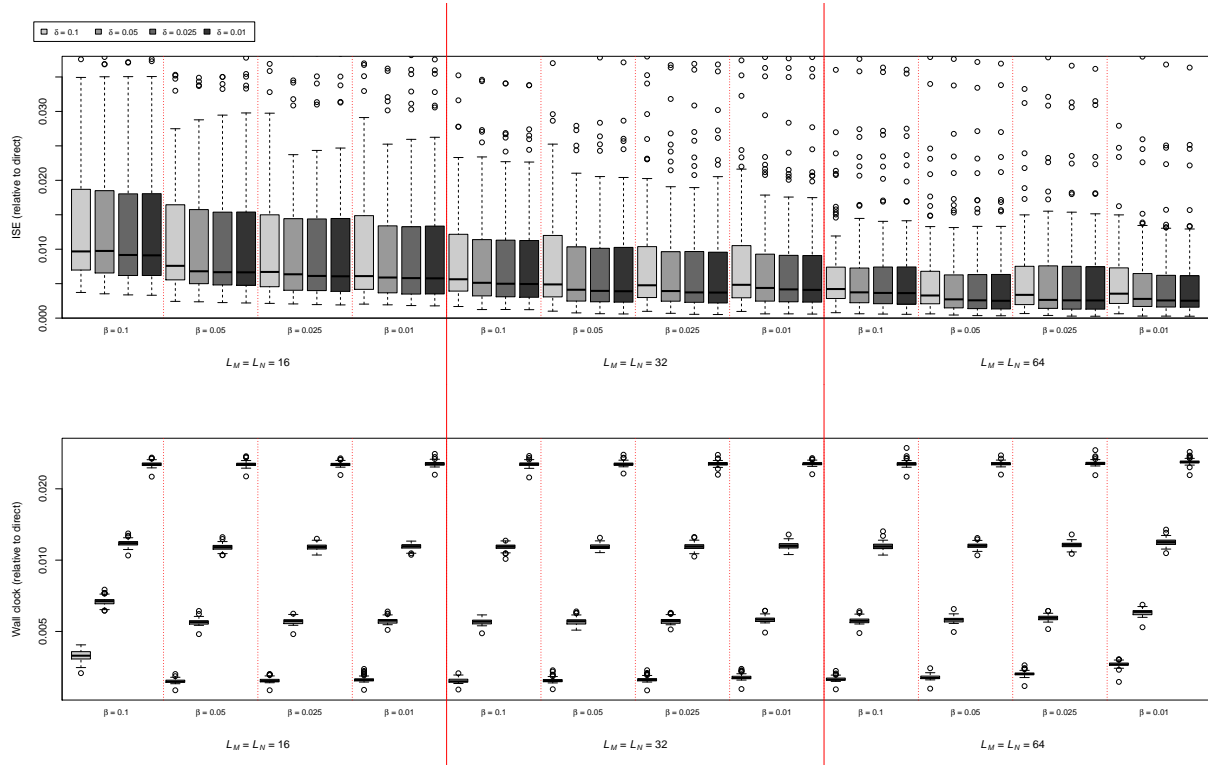

Supp. Fig. 24:  $\mu = 1000, MN = 256^2$
